# Supplementary material for: The Dion–Jacobson perovskite CsSbCl4: a promising Pb-free solar-cell absorber with optimal bandgap ∼1.4 eV, strong optical absorption ∼105cm−1, and large power-conversion efficiency above 20%
Source: Royal Society of Chemistry journal article supplement (doi:10.1039/d1ta02969j), 2021-01-01
Supplement: d1ta02969j1.pdf [file d1ta02969j1.pdf]

## Supporting Information

### **The Dion-Jacobson perovskite CsSbCl<sub>4</sub>: a promising Pb-free solar-cell absorber with optimal bandgap ~1.4 eV, strong optical absorption ~10<sup>5</sup> cm<sup>-1</sup>, and large power-conversion efficiency beyond 20%**

Wen-hui Guo,<sup>a</sup> Yao-hui Zhu,<sup>\*b</sup> Min Zhang,<sup>\*c</sup> Juan Du,<sup>a</sup> Yu-lang Cen,<sup>a</sup> Shi-ming Liu,<sup>a</sup> Yong He,<sup>a</sup> Hong-xia Zhong,<sup>d</sup> Xinqiang Wang<sup>a</sup> and Jun-jie Shi<sup>\*a</sup>

<sup>a</sup> State Key Laboratory for Artificial Microstructures and Mesoscopic Physics, School of Physics, Peking University Yangtze Delta Institute of Optoelectronics, Peking University, Beijing 100871, China.

<sup>b</sup> Physics Department, Beijing Technology and Business University, Beijing 100048, China

<sup>c</sup> Inner Mongolia Key Laboratory for Physics and Chemistry of Functional Materials, College of Physics and Electronic Information, Inner Mongolia Normal University, Hohhot 010022, China

<sup>d</sup> School of Mathematics and Physics, China University of Geosciences, Wuhan 430074, China

\*Corresponding authors: E-mail: [jjshi@pku.edu.cn](mailto:jjshi@pku.edu.cn); [zhuyaohui@th.btbu.edu.cn](mailto:zhuyaohui@th.btbu.edu.cn); [zhangm@imnu.edu.cn](mailto:zhangm@imnu.edu.cn)

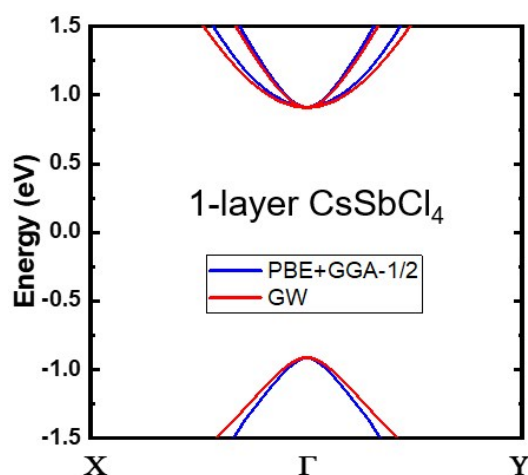

**Figure S1.** Electronic structures derived from PBE calculations with the GGA-1/2 bandgap modulation are in excellent consistent with the accurate and time-consuming GW calculations for the 1-layer CsSbCl<sub>4</sub>. In our GGA-1/2 calculations, we chosen 8 as the value of parameter  $n$  for Cl<sup>-</sup> and Sb<sup>3+</sup>, then the parameter  $CUT$  is selected as 1.3 and 1.2 a.u. for Cl<sup>-</sup> and Sb<sup>3+</sup>, respectively.

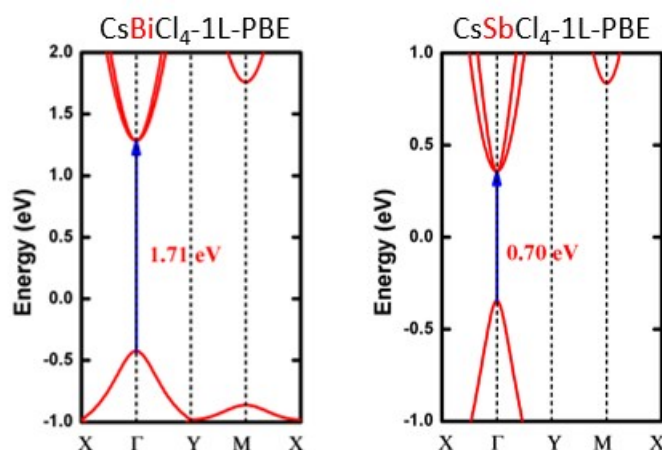

**Figure S2.** The electronic band structures of (a) CsBiCl<sub>4</sub> and (b) CsSbCl<sub>4</sub> 1-layer using the PBE method without SOC into account. The Bi-based DJ perovskite exhibits similar electronic dispersion to the Sb-based counterpart. However, the bandgap of CsBiCl<sub>4</sub> (1.71 eV) is much larger than that of CsSbCl<sub>4</sub> (0.70 eV). The atomic orbital energy of Bi-6s is clearly lower than that of Sb-5s, and this in turn lowers the valence band (dominated by Bi-6s orbitals) of CsBiCl<sub>4</sub> so as to enlarge its bandgap. Moreover, the realistic bandgap of CsBiCl<sub>4</sub> should be even larger (probably over 2 eV) since it is underestimated by the PBE functional. Therefore, CsBiCl<sub>4</sub> is not suitable for the solar-cell absorber due to its overlarge bandgap.

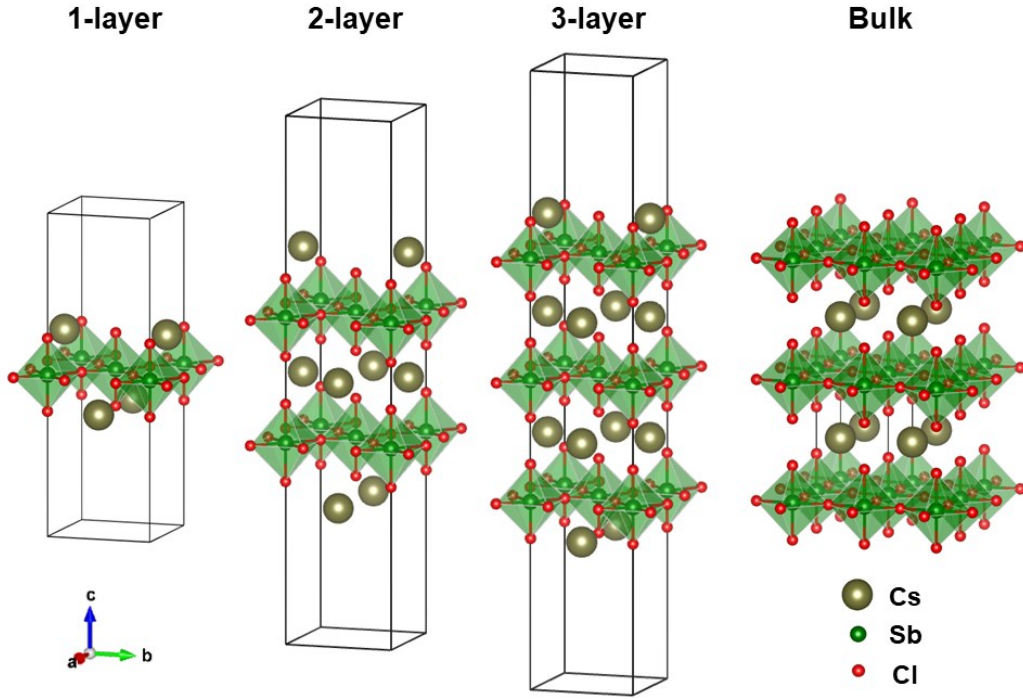

**Figure S3.** The crystal structures of 1-, 2-, and 3-layer and bulk CsSbCl<sub>4</sub>.

**Table S1.** Fully optimized lattice parameter  $a$ , interlayer distance  $d$  and the single layer thickness  $h$  (in units of Å) in 2D layered lead-free halide perovskites CsSbCl<sub>4</sub>.

| Material            | Layer thickness | $a$  | $d$  | $h$  |
|---------------------|-----------------|------|------|------|
| CsSbCl <sub>4</sub> | 1-layer         | 5.36 | -    | 5.19 |
|                     | 2-layer         | 5.36 | 3.66 | 5.19 |
|                     | 3-layer         | 5.31 | 3.31 | 5.22 |
|                     | Bulk            | 5.28 | 3.30 | 5.25 |

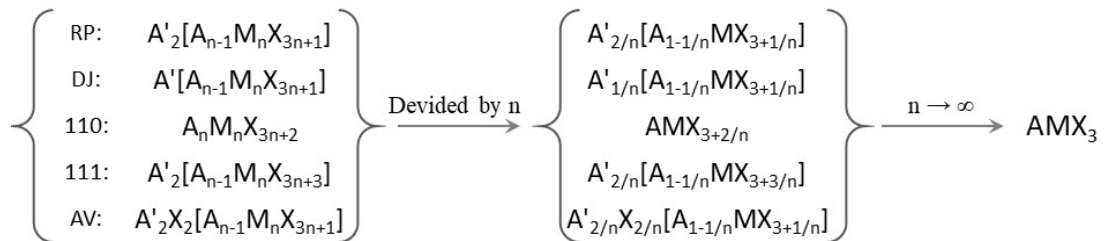

**Figure S4.** The 2D perovskites will be transformed into AMX<sub>3</sub> perovskites if the stack cycle number  $n$  in 2D perovskites approaches infinity.

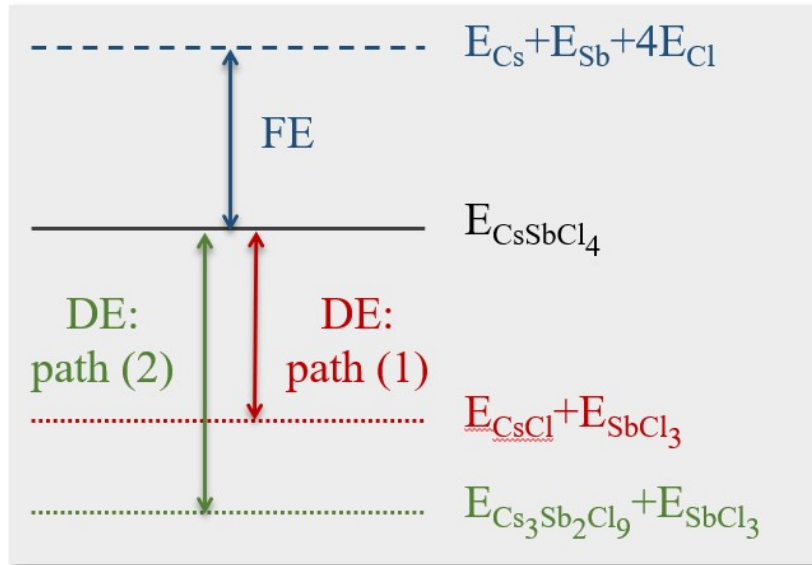

**Figure S5.** The schematic diagram for calculating the formation energy (FE) and decomposition energy (DE) of CsSbCl<sub>4</sub>.

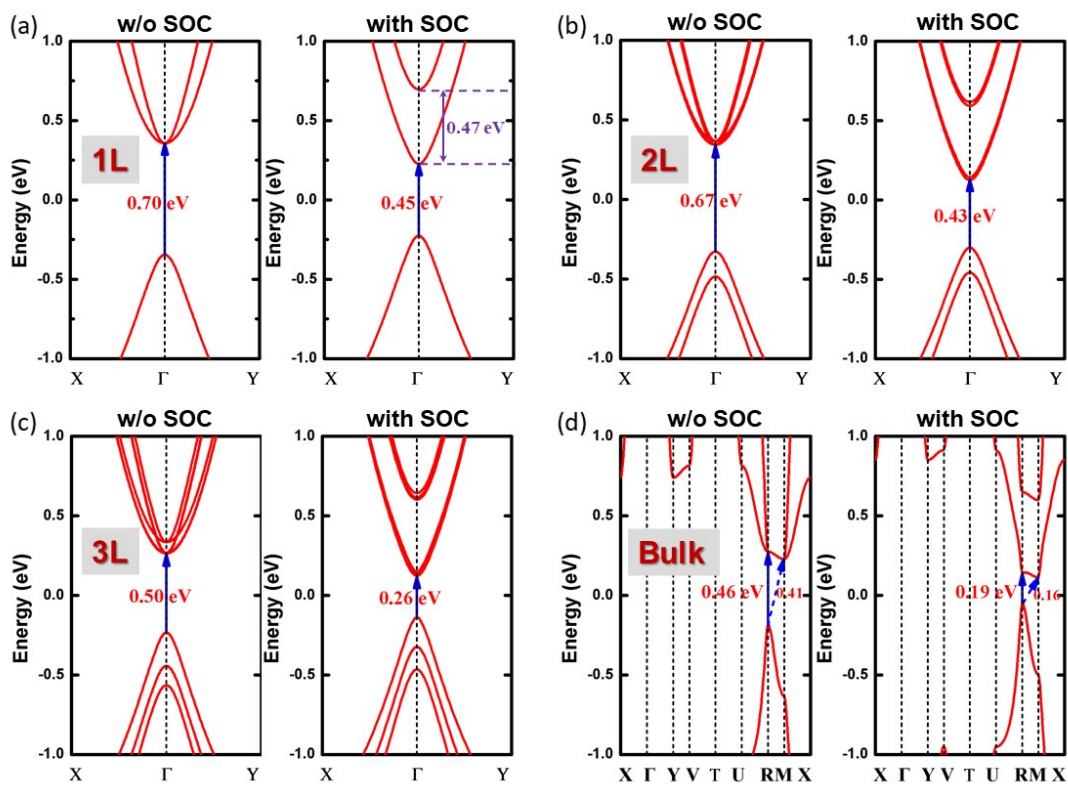

**Figure S6.** The electronic band structures in CsSbCl<sub>4</sub> (a) 1-layer (1L), (b) 2-layer (2L), (c) 3-layer (3L) and (d) bulk by using the PBE method, in which the right figure takes the influence of the spin-orbit coupling (SOC) into consideration.

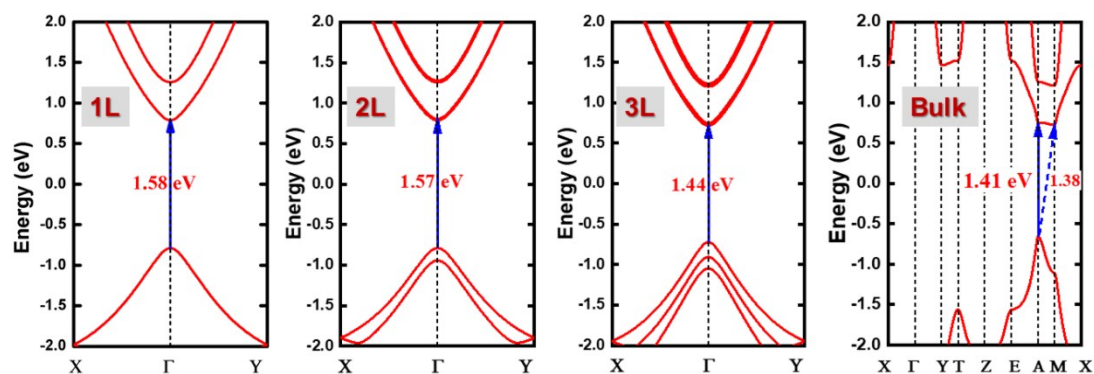

**Figure S7.** The electronic band structures of CsSbCl<sub>4</sub> in 1-layer, 2-layer, 3-layer and bulk configurations. Here, the band dispersions of band edge are given by PBE with the SOC effect and the bandgaps are calculated by the GGA-1/2 approach.

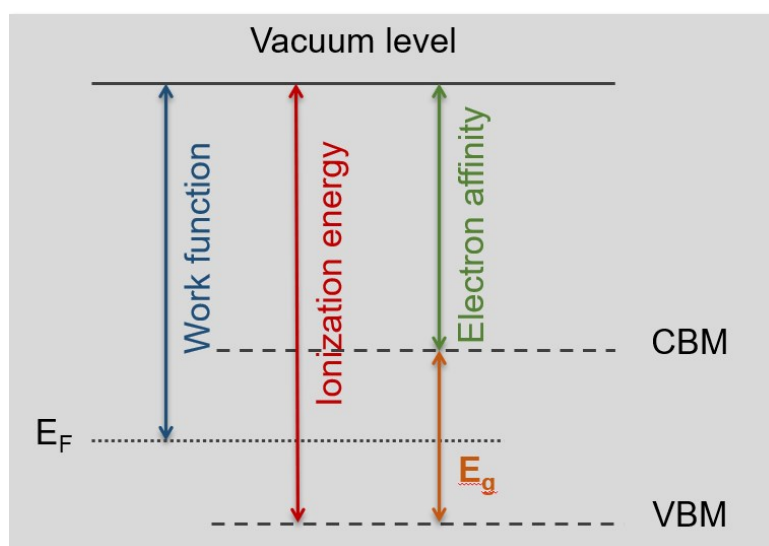

**Figure S8.** The schematic diagram for obtaining the band edge energy position. Here, the Fermi level  $E_F$ , work function, ionization energy, and electron affinity are also labelled.

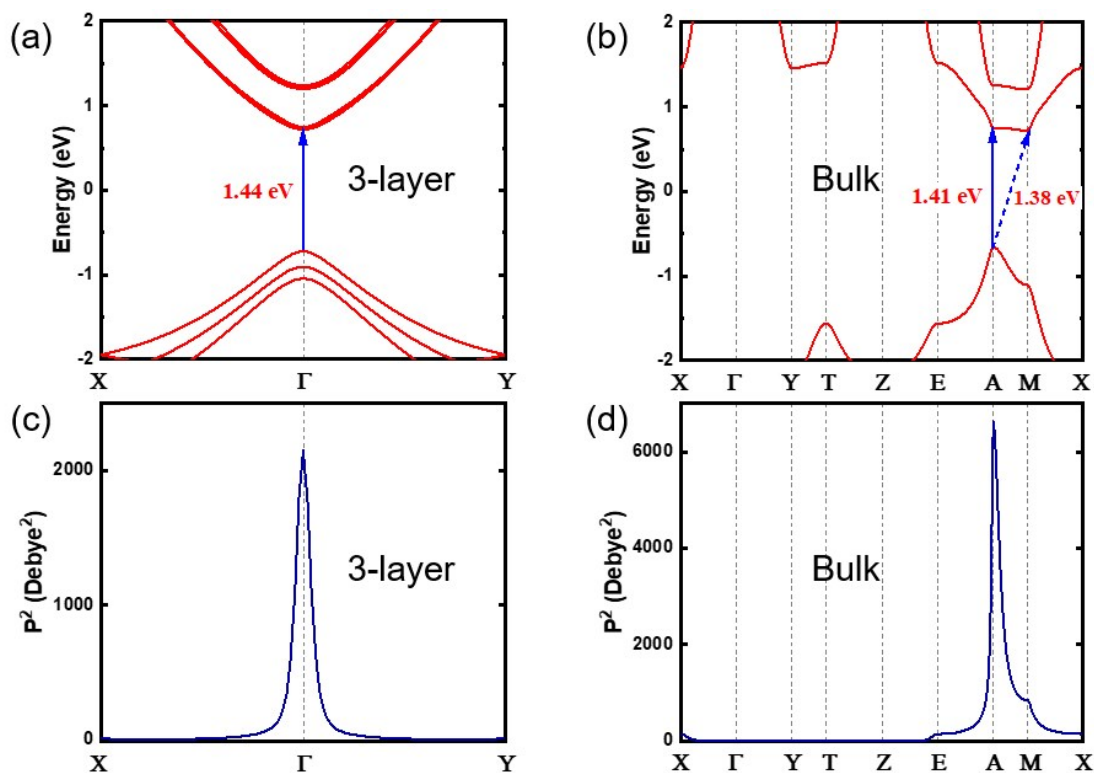

**Figure S9.** The band structures (a and b) and the corresponding square of the transition dipole moments between the band edges (c and d) for 3-layer (a and c) and bulk (b and d) CsSbCl<sub>4</sub>.

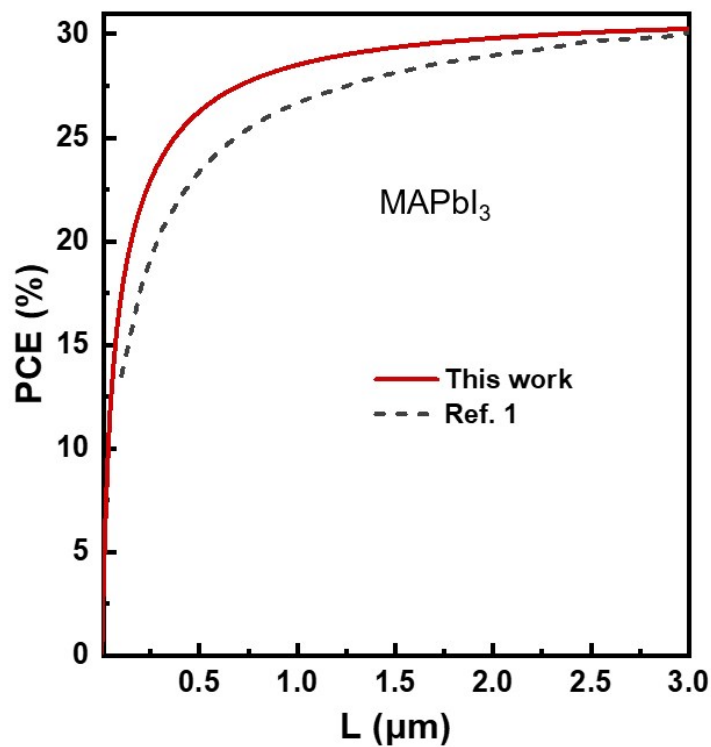

**Figure S10.** The calculated PCE as a function of the thickness L of the MAPbI<sub>3</sub> absorber by using the SLME method. The results in this work are in agreement with ref. 1, which indicates the accuracy of our current calculations.

**Table S2.** Photovoltaic device parameters of the TiO<sub>2</sub>/MAPbI<sub>3</sub>/spiro-OMeTAD junction derived from the wxAMPS code, the corresponding experimental parameters from ref. 2 are also given for comparison.

| Material           | Method        | I <sub>SC</sub><br>(mA/cm <sup>2</sup> ) | V <sub>OC</sub><br>(V) | FF<br>(%) | PCE<br>(%) |
|--------------------|---------------|------------------------------------------|------------------------|-----------|------------|
| MAPbI <sub>3</sub> | <u>wxAMPS</u> | 22.65                                    | 1.20                   | 83.28     | 22.64      |
|                    | Exp           | 23.34                                    | 1.11                   | 77.31     | 20.10      |

**Table S3.** Material parameters are used in the simulation of CsSbCl<sub>4</sub>- and MAPbI<sub>3</sub>-based perovskite solar cells. These parameters, including thickness, carrier mobility, donor (acceptor) concentration, effective density of states, and defect density, are taken from ref. 3.

| Parameters                                                             | TiO <sub>2</sub>              | Perovskite absorber                   | <u>spiro-OMeTAD</u>           |
|------------------------------------------------------------------------|-------------------------------|---------------------------------------|-------------------------------|
| Thickness ( $\mu\text{m}$ )                                            | 0.03                          | 0.5                                   | 0.2                           |
| Bandgap (eV)                                                           | 3.2                           | 1.55 <sup>a</sup> , 1.41 <sup>b</sup> | 3.04                          |
| Relative permittivity                                                  | 9                             | 32 <sup>a</sup> , 10 <sup>b</sup>     | 3                             |
| Electron affinity (eV)                                                 | 4                             | 3.93 <sup>a</sup> , 3.77 <sup>b</sup> | 2.11                          |
| Electron mobility (cm <sup>2</sup> V <sup>-1</sup> s <sup>-1</sup> )   | 20                            | 2 <sup>a</sup> , 501 <sup>b</sup>     | 2 $\times$ 10 <sup>-4</sup>   |
| Hole mobility (cm <sup>2</sup> V <sup>-1</sup> s <sup>-1</sup> )       | 10                            | 2 <sup>a</sup> , 22806 <sup>b</sup>   | 2 $\times$ 10 <sup>-4</sup>   |
| Donor concentration (cm <sup>-3</sup> )                                | 1 $\times$ 10 <sup>16</sup>   | 0                                     | 0                             |
| Acceptor concentration (cm <sup>-3</sup> )                             | 0                             | 2.1 $\times$ 10 <sup>17</sup>         | 1 $\times$ 10 <sup>18</sup>   |
| Effective density of states in the conduction band (cm <sup>-3</sup> ) | 2.2 $\times$ 10 <sup>18</sup> | 2.2 $\times$ 10 <sup>18</sup>         | 2.2 $\times$ 10 <sup>18</sup> |
| Effective density of states in the valance band (cm <sup>-3</sup> )    | 1.8 $\times$ 10 <sup>19</sup> | 1.8 $\times$ 10 <sup>19</sup>         | 1.8 $\times$ 10 <sup>19</sup> |
| Defect density (cm <sup>-3</sup> )                                     | 1 $\times$ 10 <sup>17</sup>   | 1 $\times$ 10 <sup>14</sup>           | 1 $\times$ 10 <sup>16</sup>   |

<sup>a</sup>Parameters of MAPbI<sub>3</sub>.

<sup>b</sup>Parameters of CsSbCl<sub>4</sub>.

## References:

1. W.-J. Yin, T. Shi and Y. Yan, *Adv. Mater.*, 2014, **26**, 4653-4658.
2. S. You, H. Wang, S. Bi, J. Zhou, L. Qin, X. Qiu, Z. Zhao, Y. Xu, Y. Zhang, X. Shi, H. Zhou and Z. Tang, *Adv. Mater.*, 2018, **30**, 1706924.
3. R. Jeyakumar, A. Bag, R. Nekovei and R. Radhakrishnan, *Sol. Energy*, 2019, **190**, 104-111.
